# Supplementary material for: The recombinant BMP-2 loaded silk fibroin microspheres improved the bone phenotype of mild osteogenesis imperfecta mice
Source: PeerJ. 2023 Oct 30;11:e16191. doi: 10.7717/peerj.16191 (PMC10621593; doi:10.7717/peerj.16191)
Supplement: Supplemental Information 4 [file peerj-11-16191-s004.xlsx]

## Sheet: Sheet1
sampling time point (day)	rBMP-2 concentration of release 1 (pg/mL)	total amount of rBMP-2 (pg)	% loaded		rBMP-2 concentration of release 1 (pg/mL)	total amount of rBMP-2 (pg)	% loaded		rBMP-2 concentration of release 3 (pg/mL)	total amount of rBMP-2 (pg)	% loaded
0.0417	1350.57	4051.7	5.40227		872.479	2617.44	3.48992		910.769	2732.31	3.64308
0.123	1562.4	4687.19	6.24959		1061.59	3184.78	4.24637		1098.71	3296.14	4.39486
0.25	1767.32	5301.97	7.0693		1375.29	4125.87	5.50116		1856.32	5568.95	7.42527
0.5	3584.93	10754.8	14.3397		2244.87	6734.6	8.97947		2250.86	6752.59	9.00346
1	4179.41	12538.2	16.7176		3491.64	10474.9	13.9666		3280.82	9842.46	13.1233
2	4976	14928	19.904		4244.87	12734.6	16.9795		4135.6	12406.8	16.5424
3	6557.76	19673.3	26.231		5061.59	15184.8	20.2464		4994.79	14984.4	19.9792
6	5307.96	15923.9	21.2318		5472.26	16416.8	21.889		5172.26	15516.8	20.689
9	5861.28	17583.9	23.4451		6061.59	18184.8	24.2464		6270.11	18810.3	25.0805
12	6224.34	18673	24.8973		7195.2	21585.6	28.7808		6945.02	20835.1	27.7801
15	7458.22	22374.6	29.8329		6872.03	20616.1	27.4881		7209.36	21628.1	28.8374
18	7153.85	21461.5	28.6154		7259.36	21778.1	29.0374		6834.09	20502.3	27.3364
21	6894.79	20684.4	27.5792		7083.99	21252	28.336		7005.28	21015.8	28.0211
24	7185.83	21557.5	28.7433		6820.66	20462	27.2826		7345.94	22037.8	29.3838
27	6973.68	20921	27.8947		6292.66	18878	25.1706		6836.66	20510	27.3467
30	6630.46	19891.4	26.5218		6204.37	18613.1	24.8175		6900.39	20701.2	27.6015
